# Supplementary material for: Variation of the ground spin state in homo- and hetero-octanuclear copper(ii) and nickel(ii) double-star complexes with a meso-helicate-type metallacryptand core
Source: Royal Society of Chemistry journal article supplement (doi:10.1039/b926709c), 2010-01-01
Supplement: b926709c.pdf [file b926709c.pdf]

Electronic Supplementary Information (ESI) concerning the manuscript:

**Variation of the ground spin state in homo- and heterooctanuclear copper(II)  
and nickel(II) double-star complexes with a *meso*-helicite-type  
metallacryptand core**

Emilio Pardo, Marie-Claire Dul, Rodrigue Lescouëzec, Lise-Marie Chamoreau, Yves Journaux,\*  
Jorge Pasán, Catalina Ruiz-Pérez, Miguel Julve, Francesc Lloret,\* Rafael Ruiz-García and Joan  
Cano\*

**Table of contents**

**Preparation of the ligands**

|                            |    |
|----------------------------|----|
| <b>H<sub>4</sub>mpba</b>   | S2 |
| <b>H<sub>4</sub>Mempba</b> | S2 |

**Preparation of the binuclear nickel(II) complexes**

|                                                                              |    |
|------------------------------------------------------------------------------|----|
| <b>Na<sub>8</sub>[Ni<sub>2</sub>(mpba)<sub>3</sub>] · 12H<sub>2</sub>O</b>   | S3 |
| <b>Na<sub>8</sub>[Ni<sub>2</sub>(Mempba)<sub>3</sub>] · 18H<sub>2</sub>O</b> | S3 |

**Magnetic properties**

|                                                                                                                                                                                                                         |    |
|-------------------------------------------------------------------------------------------------------------------------------------------------------------------------------------------------------------------------|----|
| <b>Fig. S1</b> Temperature dependence of $\chi_M T$ of Na <sub>8</sub> [Ni <sub>2</sub> (mpba) <sub>3</sub> ] · 12H <sub>2</sub> O<br>and Na <sub>8</sub> [Ni <sub>2</sub> (Mempba) <sub>3</sub> ] · 18H <sub>2</sub> O | S4 |
| <b>Table S1</b> Spin states and energies for an octanuclear copper(II) complex<br>with a “dimer-of-tetramers” structure                                                                                                 | S5 |
| <b>Table S2</b> Spin states and energies for an octanuclear nickel(II)-copper(II)<br>complex with a “dimer-of-tetramers” structure                                                                                      | S6 |
| <b>Table S3</b> Spin states and energies for an octanuclear nickel(II) complex<br>with a “dimer-of-tetramers” structure                                                                                                 | S8 |

## Preparation of the ligands

**H<sub>2</sub>Et<sub>2</sub>mpba.** Ethyl oxalyl chloride ester (14.0 mL, 120 mmol) was added to a solution of 1,3-phenylenediamine (6.5 g, 60 mmol) and triethylamine (16.8 mL, 120 mmol) in THF (250 mL) under vigorous stirring at 0 °C. The reaction mixture was brought up to reflux for 1 h and then it was filtered to remove the precipitate of triethylammonium chloride. Solvent elimination under vacuum of the filtered solution afforded a white solid, which was treated with water, collected by filtration, washed with diethyl ether, and dried under vacuum (16.6 g, yield 90%). *Anal.* calc. for C<sub>15</sub>H<sub>18</sub>N<sub>2</sub>O<sub>6</sub> (*M* = 308): C, 54.55; H, 5.19; N, 9.09 %. Found: C, 54.57; H, 5.18; N, 9.04 %. <sup>1</sup>H NMR [(CD<sub>3</sub>)<sub>2</sub>SO, ppm]: δ 1.32 (t, 6 H; 2 CH<sub>3</sub> from ethyl groups), 4.31 (q, 4 H; 2 CH<sub>2</sub> from ethyl groups), 7.34 (dt, 1 H; 5-H from phenylene group), 7.50 (dd, 2 H; 4-H and 6-H from phenylene group), 8.22 (t, 1 H; 2-H from phenylene group), 10.83 (s, 2 H; 2 NH). IR (KBr, cm<sup>-1</sup>): 3349 (NH), 1725, 1715, 1698 (CO).

**H<sub>2</sub>Et<sub>2</sub>Mempba.** Ethyl oxalyl chloride ester (14.0 mL, 120 mmol) was added to a solution of 2,4-toluenediamine (7.3 g, 60 mmol) and triethylamine (16.8 mL, 120 mmol) in THF (250 mL) under vigorous stirring at 0 °C. The reaction mixture was brought up to reflux for 1 h and then it was filtered to remove the precipitate of triethylammonium chloride. Solvent elimination under vacuum of the filtered solution afforded a white solid, which was treated with water, collected by filtration, washed with diethyl ether, and dried under vacuum (15.5 g, yield 80%). *Anal.* calc. for C<sub>15</sub>H<sub>18</sub>N<sub>2</sub>O<sub>6</sub> (*M* = 322): C, 55.90; H, 5.59; N, 8.70 %. Found: C, 56.12; H, 5.63; N, 8.47 %. <sup>1</sup>H NMR [(CD<sub>3</sub>)<sub>2</sub>SO, ppm]: δ 1.80 (t, 3 H; CH<sub>3</sub> from ethyl group), 1.82 (t, 3 H; CH<sub>3</sub> from ethyl group), 3.24 (s, 3 H; CH<sub>3</sub> from phenylene group), 4.79 (q, 2 H; CH<sub>2</sub> from ethyl group), 4.82 (q, 2 H; CH<sub>2</sub> from ethyl group), 7.72 (d, 1 H; 5-H from phenylene group), 8.11 (d, 1 H; 6-H from

phenylene group), 8.62 (s, 1 H; 2-H from phenylene group), 9.85 (s, 1 H; NH), 10.37 (s, 1 H; NH). IR (KBr,  $\text{cm}^{-1}$ ): 3460 (NH), 1735, 1700, 1610 (CO).

### Preparation of the binuclear nickel(II) complexes

**$\text{Na}_8[\text{Ni}_2(\text{mpba})_3] \cdot 12\text{H}_2\text{O}$ .** An aqueous solution (15 mL) of NaOH (0.96 g, 24.0 mmol) was added to a suspension of the diethyl ester derivative of  $\text{H}_4\text{mpba}$  (1.84 g, 6.0 mmol) in water (35 mL) under stirring.  $\text{Ni}(\text{NO}_3)_2 \cdot 6\text{H}_2\text{O}$  (1.16 g, 4.0 mmol) dissolved in water (5 mL) was then added dropwise to the clear solution under stirring. The resulting deep green solution was filtered on paper to eliminate the small amount of solid particles. Solvent reduction under vacuum of the filtered solution afforded a blue-greenish solid, which was collected by filtration, washed with ethanol and diethyl ether, and air-dried (2.15 g, yield 85%). *Anal. calc.* for  $\text{C}_{30}\text{H}_{36}\text{N}_6\text{Na}_8\text{Ni}_2\text{O}_{30}$  ( $M = 1261$ ): C, 28.53; H, 2.85; N, 6.66 %. Found: C, 29.11; H, 3.03; N, 6.59 %. IR (KBr,  $\text{cm}^{-1}$ ): 1585 (CO).

**$\text{Na}_8[\text{Ni}_2(\text{Mempba})_3] \cdot 18\text{H}_2\text{O}$ .** An aqueous solution (15 mL) of NaOH (0.96 g, 24.0 mmol) was added to a suspension of the diethyl ester derivative of  $\text{H}_4\text{Mempba}$  (1.93 g, 6.0 mmol) in water (35 mL) under stirring.  $\text{Ni}(\text{NO}_3)_2 \cdot 6\text{H}_2\text{O}$  (1.16 g, 4.0 mmol) dissolved in water (5 mL) was then added dropwise to the clear solution under stirring. The resulting deep green solution was filtered on paper to eliminate the small amount of solid particles. Solvent reduction under vacuum of the filtered solution afforded a blue-greenish solid, which was collected by filtration, washed with ethanol and diethyl ether, and air-dried (2.10 g, yield 75%). *Anal. calc.* for  $\text{C}_{33}\text{H}_{54}\text{N}_6\text{Na}_8\text{Ni}_2\text{O}_{36}$  ( $M = 1411$ ): C, 28.07; H, 3.83; N, 5.95 %. Found: C, 28.31; H, 3.80; N, 5.85 %. IR (KBr,  $\text{cm}^{-1}$ ): 1590 (C=O).

## Magnetic Properties

**Fig. S1** Temperature dependence of  $\chi_M T$  of  $\text{Na}_8[\text{Ni}_2(\text{mpba})_3] \cdot 12\text{H}_2\text{O}$  ( $\circ$ ) and  $\text{Na}_8[\text{Ni}_2(\text{Mempba})_3] \cdot 18\text{H}_2\text{O}$  ( $\square$ ). Solid lines are the best-fit curves (see text, footnote ‡).

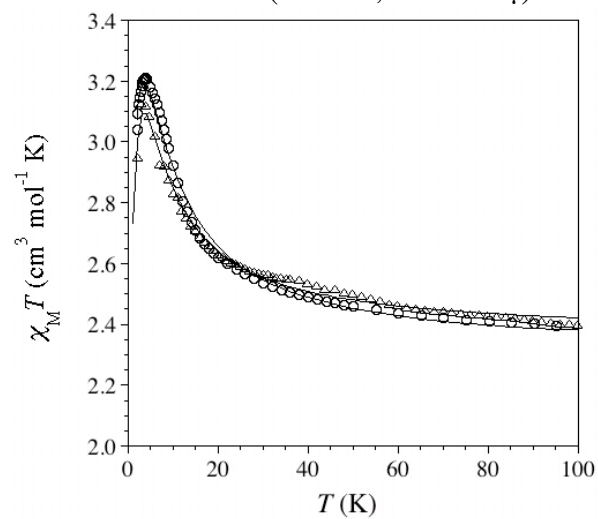

**Table S1** Spin states and energies for an octanuclear copper(II) complex with a “dimer-of-tetramers” structure<sup>a,b,c</sup>

| $S_A^*$ | $S_A$ | $S_B^*$ | $S_B$ | $S$ | $E$               | $n$ |
|---------|-------|---------|-------|-----|-------------------|-----|
| 1/2     | 0     | 1/2     | 0     | 0   | $-J$              | 4   |
| 1/2     | 0     | 1/2     | 1     | 1   | $-2J$             | 4   |
| 1/2     | 0     | 3/2     | 1     | 1   | $-1/2J$           | 2   |
| 1/2     | 0     | 3/2     | 2     | 2   | $-5/2J$           | 2   |
| 1/2     | 1     | 1/2     | 0     | 1   | $-2J$             | 4   |
| 1/2     | 1     | 1/2     | 1     | 0   | $-3J$             | 4   |
| 1/2     | 1     | 1/2     | 1     | 1   | $-3J$             | 4   |
| 1/2     | 1     | 1/2     | 1     | 2   | $-3J$             | 4   |
| 1/2     | 1     | 3/2     | 1     | 0   | $-3/2J$           | 2   |
| 1/2     | 1     | 3/2     | 1     | 1   | $-3/2J$           | 2   |
| 1/2     | 1     | 3/2     | 1     | 2   | $-3/2J$           | 2   |
| 1/2     | 1     | 3/2     | 2     | 1   | $-7/2J$           | 2   |
| 1/2     | 1     | 3/2     | 2     | 2   | $-7/2J$           | 2   |
| 1/2     | 1     | 3/2     | 2     | 3   | $-7/2J$           | 2   |
| 3/2     | 1     | 1/2     | 0     | 1   | $-1/2J$           | 2   |
| 3/2     | 1     | 1/2     | 1     | 0   | $-3/2J$           | 2   |
| 3/2     | 1     | 1/2     | 1     | 1   | $-3/2J$           | 2   |
| 3/2     | 1     | 1/2     | 1     | 2   | $-3/2J$           | 2   |
| 3/2     | 1     | 3/2     | 1     | 0   | $2j_{\text{eff}}$ | 1   |
| 3/2     | 1     | 3/2     | 1     | 1   | $j_{\text{eff}}$  | 1   |
| 3/2     | 1     | 3/2     | 1     | 2   | $-j_{\text{eff}}$ | 1   |
| 3/2     | 1     | 3/2     | 2     | 1   | $-2J$             | 1   |
| 3/2     | 1     | 3/2     | 2     | 2   | $-2J$             | 1   |
| 3/2     | 1     | 3/2     | 2     | 3   | $-2J$             | 1   |
| 3/2     | 2     | 1/2     | 0     | 2   | $-5/2J$           | 2   |
| 3/2     | 2     | 1/2     | 1     | 1   | $-7/2J$           | 2   |
| 3/2     | 2     | 1/2     | 1     | 2   | $-7/2J$           | 2   |
| 3/2     | 2     | 1/2     | 1     | 3   | $-7/2J$           | 2   |
| 3/2     | 2     | 3/2     | 1     | 1   | $-2J$             | 1   |
| 3/2     | 2     | 3/2     | 1     | 2   | $-2J$             | 1   |
| 3/2     | 2     | 3/2     | 1     | 3   | $-2J$             | 1   |
| 3/2     | 2     | 3/2     | 2     | 0   | $-4J$             | 1   |
| 3/2     | 2     | 3/2     | 2     | 1   | $-4J$             | 1   |
| 3/2     | 2     | 3/2     | 2     | 2   | $-4J$             | 1   |
| 3/2     | 2     | 3/2     | 2     | 3   | $-4J$             | 1   |
| 3/2     | 2     | 3/2     | 2     | 4   | $-4J$             | 1   |

<sup>a</sup>  $S$  are the spin values of the  $\text{Cu}_{8}^{\text{II}}$  entity,  $S_A$  and  $S_B$  are the spin values of each  $\text{Cu}_4^{\text{II}}$  star unit, and  $S_A^*$  and  $S_B^*$  are the intermediate spin values corresponding to the coupling of the three peripheral  $\text{Cu}^{\text{II}}$  ions of each  $\text{Cu}_4^{\text{II}}$  star unit. <sup>b</sup>  $E$  and  $n$  are the spin state energy and the number of degenerated spin states. <sup>c</sup>  $J$  and  $j_{\text{eff}}$  are the intratetramer and effective intertetramer coupling parameters as defined in eq S1 [with  $S_{1A} = S_{3A} = S_{4A} = S_{5A} = S_{2B} = S_{6B} = S_{7B} = S_{8B} = S_{\text{Cu}} = 1/2$  and  $S_A = S_B = 1$ ].

**Table S2** Spin states and energies for an octanuclear nickel(II) copper(II) complex with a “dimer-of-tetramers” structure<sup>a,b,c</sup>

| $S_A^*$ | $S_A$ | $S_B^*$ | $S_B$ | $S$ | $E$                   | $n$ |
|---------|-------|---------|-------|-----|-----------------------|-----|
| 1/2     | 1/2   | 1/2     | 1/2   | 0   | $-3 J$                | 4   |
| 1/2     | 1/2   | 1/2     | 1/2   | 1   | $-3 J$                | 4   |
| 1/2     | 1/2   | 1/2     | 3/2   | 1   | $-9/2 J$              | 4   |
| 1/2     | 1/2   | 1/2     | 3/2   | 2   | $-9/2 J$              | 4   |
| 1/2     | 1/2   | 3/2     | 1/2   | 0   | $-3/2 J$              | 2   |
| 1/2     | 1/2   | 3/2     | 1/2   | 1   | $-3/2 J$              | 2   |
| 1/2     | 1/2   | 3/2     | 3/2   | 1   | $-3 J$                | 2   |
| 1/2     | 1/2   | 3/2     | 3/2   | 2   | $-3 J$                | 2   |
| 1/2     | 1/2   | 3/2     | 5/2   | 2   | $-11/2 J$             | 2   |
| 1/2     | 1/2   | 3/2     | 5/2   | 3   | $-11/2 J$             | 2   |
| 1/2     | 3/2   | 1/2     | 1/2   | 1   | $-9/2 J$              | 4   |
| 1/2     | 3/2   | 1/2     | 1/2   | 2   | $-9/2 J$              | 4   |
| 1/2     | 3/2   | 1/2     | 3/2   | 0   | $-6 J$                | 4   |
| 1/2     | 3/2   | 1/2     | 3/2   | 1   | $-6 J$                | 4   |
| 1/2     | 3/2   | 1/2     | 3/2   | 2   | $-6 J$                | 4   |
| 1/2     | 3/2   | 1/2     | 3/2   | 3   | $-6 J$                | 4   |
| 1/2     | 3/2   | 3/2     | 1/2   | 1   | $-3 J$                | 2   |
| 1/2     | 3/2   | 3/2     | 1/2   | 2   | $-3 J$                | 2   |
| 1/2     | 3/2   | 3/2     | 3/2   | 0   | $-9/2 J$              | 2   |
| 1/2     | 3/2   | 3/2     | 3/2   | 1   | $-9/2 J$              | 2   |
| 1/2     | 3/2   | 3/2     | 3/2   | 2   | $-9/2 J$              | 2   |
| 1/2     | 3/2   | 3/2     | 3/2   | 3   | $-9/2 J$              | 2   |
| 1/2     | 3/2   | 3/2     | 5/2   | 1   | $-7 J$                | 2   |
| 1/2     | 3/2   | 3/2     | 5/2   | 2   | $-7 J$                | 2   |
| 1/2     | 3/2   | 3/2     | 5/2   | 3   | $-7 J$                | 2   |
| 1/2     | 3/2   | 3/2     | 5/2   | 4   | $-7 J$                | 2   |
| 3/2     | 1/2   | 1/2     | 1/2   | 0   | $-3/2 J$              | 2   |
| 3/2     | 1/2   | 1/2     | 1/2   | 1   | $-3/2 J$              | 2   |
| 3/2     | 1/2   | 1/2     | 3/2   | 1   | $-3 J$                | 2   |
| 3/2     | 1/2   | 1/2     | 3/2   | 2   | $-3 J$                | 2   |
| 3/2     | 1/2   | 3/2     | 1/2   | 0   | $-3/4 j_{\text{eff}}$ | 1   |
| 3/2     | 1/2   | 3/2     | 1/2   | 1   | $-1/4 j_{\text{eff}}$ | 1   |
| 3/2     | 1/2   | 3/2     | 3/2   | 1   | $-3/2 J$              | 1   |
| 3/2     | 1/2   | 3/2     | 3/2   | 2   | $-3/2 J$              | 1   |
| 3/2     | 1/2   | 3/2     | 5/2   | 2   | $-4 J$                | 1   |
| 3/2     | 1/2   | 3/2     | 5/2   | 3   | $-4 J$                | 1   |
| 3/2     | 3/2   | 1/2     | 1/2   | 1   | $-3 J$                | 2   |
| 3/2     | 3/2   | 1/2     | 1/2   | 2   | $-3 J$                | 2   |
| 3/2     | 3/2   | 1/2     | 3/2   | 0   | $-9/2 J$              | 2   |
| 3/2     | 3/2   | 1/2     | 3/2   | 1   | $-9/2 J$              | 2   |
| 3/2     | 3/2   | 1/2     | 3/2   | 2   | $-9/2 J$              | 2   |
| 3/2     | 3/2   | 3/2     | 3/2   | 3   | $-9/2 J$              | 2   |

|     |     |     |     |   |                |   |
|-----|-----|-----|-----|---|----------------|---|
| 3/2 | 3/2 | 3/2 | 1/2 | 1 | -3/2 <i>J</i>  | 1 |
| 3/2 | 3/2 | 3/2 | 1/2 | 2 | -3/2 <i>J</i>  | 1 |
| 3/2 | 3/2 | 3/2 | 3/2 | 0 | -3 <i>J</i>    | 1 |
| 3/2 | 3/2 | 3/2 | 3/2 | 1 | -3 <i>J</i>    | 1 |
| 3/2 | 3/2 | 3/2 | 3/2 | 2 | -3 <i>J</i>    | 1 |
| 1/2 | 3/2 | 3/2 | 3/2 | 3 | -3 <i>J</i>    | 1 |
| 1/2 | 3/2 | 3/2 | 5/2 | 1 | -11/2 <i>J</i> | 1 |
| 1/2 | 3/2 | 3/2 | 5/2 | 2 | -11/2 <i>J</i> | 1 |
| 1/2 | 3/2 | 3/2 | 5/2 | 3 | -11/2 <i>J</i> | 1 |
| 1/2 | 3/2 | 3/2 | 5/2 | 4 | -11/2 <i>J</i> | 1 |
| 3/2 | 5/2 | 1/2 | 1/2 | 2 | -11/2 <i>J</i> | 2 |
| 3/2 | 5/2 | 1/2 | 1/2 | 3 | -11/2 <i>J</i> | 2 |
| 3/2 | 5/2 | 1/2 | 3/2 | 1 | -7 <i>J</i>    | 2 |
| 3/2 | 5/2 | 1/2 | 3/2 | 2 | -7 <i>J</i>    | 2 |
| 3/2 | 5/2 | 1/2 | 3/2 | 3 | -7 <i>J</i>    | 2 |
| 3/2 | 5/2 | 1/2 | 3/2 | 4 | -7 <i>J</i>    | 2 |
| 3/2 | 5/2 | 3/2 | 1/2 | 2 | -4 <i>J</i>    | 1 |
| 3/2 | 5/2 | 3/2 | 1/2 | 3 | -4 <i>J</i>    | 1 |
| 3/2 | 5/2 | 3/2 | 3/2 | 1 | -11/2 <i>J</i> | 1 |
| 3/2 | 5/2 | 3/2 | 3/2 | 2 | -11/2 <i>J</i> | 1 |
| 3/2 | 5/2 | 3/2 | 3/2 | 3 | -11/2 <i>J</i> | 1 |
| 3/2 | 5/2 | 3/2 | 3/2 | 4 | -11/2 <i>J</i> | 1 |
| 3/2 | 5/2 | 3/2 | 5/2 | 0 | -8 <i>J</i>    | 1 |
| 3/2 | 5/2 | 3/2 | 5/2 | 1 | -8 <i>J</i>    | 1 |
| 3/2 | 5/2 | 3/2 | 5/2 | 2 | -8 <i>J</i>    | 1 |
| 3/2 | 5/2 | 3/2 | 5/2 | 3 | -8 <i>J</i>    | 1 |
| 3/2 | 5/2 | 3/2 | 5/2 | 4 | -8 <i>J</i>    | 1 |
| 3/2 | 5/2 | 3/2 | 5/2 | 5 | -8 <i>J</i>    | 1 |

<sup>a</sup> *S* are the spin values of the Ni<sup>II</sup><sub>2</sub>Cu<sup>II</sup><sub>6</sub> entity, *S*<sub>A</sub> and *S*<sub>B</sub> are the spin values of each Ni<sup>II</sup>Cu<sup>II</sup><sub>3</sub> star unit, and *S*<sup>\*</sup><sub>A</sub> and *S*<sup>\*</sup><sub>B</sub> are the intermediate spin values corresponding to the coupling of the three peripheral Cu<sup>II</sup> ions of each Ni<sup>II</sup>Cu<sup>II</sup><sub>3</sub> star unit. <sup>b</sup> *E* and *n* are the spin state energy and the number of degenerated spin states. <sup>c</sup> *J* and *j*<sub>eff</sub> are the intratetramer and effective intertetramer coupling parameters as defined in eq S1 [with *S*<sub>1A</sub> = *S*<sub>2B</sub> = *S*<sub>Ni</sub> = 1, *S*<sub>3A</sub> = *S*<sub>4A</sub> = *S*<sub>5A</sub> = *S*<sub>6B</sub> = *S*<sub>7B</sub> = *S*<sub>8B</sub> = *S*<sub>Cu</sub> = 1/2, and *S*<sub>A</sub> = *S*<sub>B</sub> = 1/2].

**Table S3** Spin states and energies for an octanuclear nickel(II) complex with a “dimer-of-tetramers” structure<sup>a,b,c</sup>

| $S_A^*$ | $S_A$ | $S_B^*$ | $S_B$ | $S$ | $E$     | $n$ |
|---------|-------|---------|-------|-----|---------|-----|
| 0       | 1     | 0       | 1     | 0   | $-8 J$  | 1   |
| 0       | 1     | 0       | 1     | 1   | $-8 J$  | 1   |
| 0       | 1     | 0       | 1     | 2   | $-8 J$  | 1   |
| 0       | 1     | 1       | 0     | 1   | $-6 J$  | 3   |
| 0       | 1     | 1       | 1     | 0   | $-7 J$  | 3   |
| 0       | 1     | 1       | 1     | 1   | $-7 J$  | 3   |
| 0       | 1     | 1       | 1     | 2   | $-7 J$  | 3   |
| 0       | 1     | 1       | 2     | 1   | $-9 J$  | 3   |
| 0       | 1     | 1       | 2     | 2   | $-9 J$  | 3   |
| 0       | 1     | 1       | 2     | 3   | $-9 J$  | 3   |
| 0       | 1     | 2       | 1     | 0   | $-5 J$  | 2   |
| 0       | 1     | 2       | 1     | 1   | $-5 J$  | 2   |
| 0       | 1     | 2       | 1     | 2   | $-5 J$  | 2   |
| 0       | 1     | 2       | 2     | 1   | $-7 J$  | 2   |
| 0       | 1     | 2       | 2     | 2   | $-7 J$  | 2   |
| 0       | 1     | 2       | 2     | 3   | $-7 J$  | 2   |
| 0       | 1     | 2       | 3     | 2   | $-10 J$ | 2   |
| 0       | 1     | 2       | 3     | 3   | $-10 J$ | 2   |
| 0       | 1     | 2       | 3     | 4   | $-10 J$ | 2   |
| 0       | 1     | 3       | 2     | 1   | $-4 J$  | 1   |
| 0       | 1     | 3       | 2     | 2   | $-4 J$  | 1   |
| 0       | 1     | 3       | 2     | 3   | $-4 J$  | 1   |
| 0       | 1     | 3       | 3     | 2   | $-7 J$  | 1   |
| 0       | 1     | 3       | 3     | 3   | $-7 J$  | 1   |
| 0       | 1     | 3       | 3     | 4   | $-7 J$  | 1   |
| 0       | 1     | 3       | 4     | 3   | $-11 J$ | 1   |
| 0       | 1     | 3       | 4     | 4   | $-11 J$ | 1   |
| 0       | 1     | 3       | 4     | 5   | $-11 J$ | 1   |
| 1       | 0     | 0       | 1     | 1   | $-6 J$  | 3   |
| 1       | 0     | 1       | 0     | 0   | $-4 J$  | 9   |
| 1       | 0     | 1       | 1     | 1   | $-5 J$  | 9   |
| 1       | 0     | 1       | 2     | 2   | $-7 J$  | 9   |
| 1       | 0     | 2       | 1     | 1   | $-3 J$  | 6   |
| 1       | 0     | 2       | 2     | 2   | $-5 J$  | 6   |
| 1       | 0     | 2       | 3     | 3   | $-8 J$  | 6   |
| 1       | 0     | 3       | 2     | 2   | $-2 J$  | 3   |
| 1       | 0     | 3       | 3     | 3   | $-5 J$  | 3   |
| 1       | 0     | 3       | 4     | 4   | $-9 J$  | 3   |
| 1       | 1     | 0       | 1     | 0   | $-7 J$  | 3   |
| 1       | 1     | 0       | 1     | 1   | $-7 J$  | 3   |
| 1       | 1     | 0       | 1     | 2   | $-7 J$  | 3   |
| 1       | 1     | 1       | 0     | 1   | $-5 J$  | 9   |



|   |   |   |   |   |              |   |
|---|---|---|---|---|--------------|---|
| 1 | 1 | 1 | 1 | 0 | -6 <i>J</i>  | 9 |
| 1 | 1 | 1 | 1 | 1 | -6 <i>J</i>  | 9 |
| 1 | 1 | 1 | 1 | 2 | -6 <i>J</i>  | 9 |
| 1 | 1 | 1 | 2 | 1 | -8 <i>J</i>  | 9 |
| 1 | 1 | 1 | 2 | 2 | -8 <i>J</i>  | 9 |
| 1 | 1 | 1 | 2 | 3 | -8 <i>J</i>  | 9 |
| 1 | 1 | 2 | 1 | 0 | -4 <i>J</i>  | 6 |
| 1 | 1 | 2 | 1 | 1 | -4 <i>J</i>  | 6 |
| 1 | 1 | 2 | 1 | 2 | -4 <i>J</i>  | 6 |
| 1 | 1 | 2 | 2 | 1 | -6 <i>J</i>  | 6 |
| 1 | 1 | 2 | 2 | 2 | -6 <i>J</i>  | 6 |
| 1 | 1 | 2 | 2 | 3 | -6 <i>J</i>  | 6 |
| 1 | 1 | 2 | 3 | 2 | -9 <i>J</i>  | 6 |
| 1 | 1 | 2 | 3 | 3 | -9 <i>J</i>  | 6 |
| 1 | 1 | 2 | 3 | 4 | -9 <i>J</i>  | 6 |
| 1 | 1 | 3 | 2 | 1 | -3 <i>J</i>  | 3 |
| 1 | 1 | 3 | 2 | 2 | -3 <i>J</i>  | 3 |
| 1 | 1 | 3 | 2 | 3 | -3 <i>J</i>  | 3 |
| 1 | 1 | 3 | 3 | 2 | -6 <i>J</i>  | 3 |
| 1 | 1 | 3 | 3 | 3 | -6 <i>J</i>  | 3 |
| 1 | 1 | 3 | 3 | 4 | -6 <i>J</i>  | 3 |
| 1 | 1 | 3 | 4 | 3 | -10 <i>J</i> | 3 |
| 1 | 1 | 3 | 4 | 4 | -10 <i>J</i> | 3 |
| 1 | 1 | 3 | 4 | 5 | -10 <i>J</i> | 3 |
| 1 | 2 | 0 | 1 | 1 | -9 <i>J</i>  | 3 |
| 1 | 2 | 0 | 1 | 2 | -9 <i>J</i>  | 3 |
| 1 | 2 | 0 | 1 | 3 | -9 <i>J</i>  | 3 |
| 1 | 2 | 1 | 0 | 2 | -7 <i>J</i>  | 9 |
| 1 | 2 | 1 | 1 | 1 | -8 <i>J</i>  | 9 |
| 1 | 2 | 1 | 1 | 2 | -8 <i>J</i>  | 9 |
| 1 | 2 | 1 | 1 | 3 | -8 <i>J</i>  | 9 |
| 1 | 2 | 1 | 2 | 0 | -10 <i>J</i> | 9 |
| 1 | 2 | 1 | 2 | 1 | -10 <i>J</i> | 9 |
| 1 | 2 | 1 | 2 | 2 | -10 <i>J</i> | 9 |
| 1 | 2 | 1 | 2 | 3 | -10 <i>J</i> | 9 |
| 1 | 2 | 1 | 2 | 4 | -10 <i>J</i> | 9 |
| 1 | 2 | 2 | 1 | 1 | -6 <i>J</i>  | 6 |
| 1 | 2 | 2 | 1 | 2 | -6 <i>J</i>  | 6 |
| 1 | 2 | 2 | 1 | 3 | -6 <i>J</i>  | 6 |
| 1 | 2 | 2 | 2 | 0 | -8 <i>J</i>  | 6 |
| 1 | 2 | 2 | 2 | 1 | -8 <i>J</i>  | 6 |
| 1 | 2 | 2 | 2 | 2 | -8 <i>J</i>  | 6 |
| 1 | 2 | 2 | 2 | 3 | -8 <i>J</i>  | 6 |
| 1 | 2 | 2 | 2 | 4 | -8 <i>J</i>  | 6 |
| 1 | 2 | 2 | 3 | 1 | -11 <i>J</i> | 6 |
| 1 | 2 | 2 | 3 | 2 | -11 <i>J</i> | 6 |

|   |   |   |   |   |              |   |
|---|---|---|---|---|--------------|---|
| 1 | 2 | 2 | 3 | 3 | -11 <i>J</i> | 6 |
| 1 | 2 | 2 | 3 | 4 | -11 <i>J</i> | 6 |
| 1 | 2 | 2 | 3 | 5 | -11 <i>J</i> | 6 |
| 1 | 2 | 3 | 2 | 0 | -5 <i>J</i>  | 3 |
| 1 | 2 | 3 | 2 | 1 | -5 <i>J</i>  | 3 |
| 1 | 2 | 3 | 2 | 2 | -5 <i>J</i>  | 3 |
| 1 | 2 | 3 | 2 | 3 | -5 <i>J</i>  | 3 |
| 1 | 2 | 3 | 2 | 4 | -5 <i>J</i>  | 3 |
| 1 | 2 | 3 | 3 | 1 | -8 <i>J</i>  | 3 |
| 1 | 2 | 3 | 3 | 2 | -8 <i>J</i>  | 3 |
| 1 | 2 | 3 | 3 | 3 | -8 <i>J</i>  | 3 |
| 1 | 2 | 3 | 3 | 4 | -8 <i>J</i>  | 3 |
| 1 | 2 | 3 | 3 | 5 | -8 <i>J</i>  | 3 |
| 1 | 2 | 3 | 4 | 2 | -12 <i>J</i> | 3 |
| 1 | 2 | 3 | 4 | 3 | -12 <i>J</i> | 3 |
| 1 | 2 | 3 | 4 | 4 | -12 <i>J</i> | 3 |
| 1 | 2 | 3 | 4 | 5 | -12 <i>J</i> | 3 |
| 1 | 2 | 3 | 4 | 6 | -12 <i>J</i> | 3 |
| 2 | 1 | 0 | 1 | 0 | -5 <i>J</i>  | 2 |
| 2 | 1 | 0 | 1 | 1 | -5 <i>J</i>  | 2 |
| 2 | 1 | 0 | 1 | 2 | -5 <i>J</i>  | 2 |
| 2 | 1 | 1 | 0 | 1 | -3 <i>J</i>  | 6 |
| 2 | 1 | 1 | 1 | 0 | -4 <i>J</i>  | 6 |
| 2 | 1 | 1 | 1 | 1 | -4 <i>J</i>  | 6 |
| 2 | 1 | 1 | 1 | 2 | -4 <i>J</i>  | 6 |
| 2 | 1 | 1 | 2 | 1 | -6 <i>J</i>  | 6 |
| 2 | 1 | 1 | 2 | 2 | -6 <i>J</i>  | 6 |
| 2 | 1 | 1 | 2 | 3 | -6 <i>J</i>  | 6 |
| 2 | 1 | 2 | 1 | 0 | -2 <i>J</i>  | 4 |
| 2 | 1 | 2 | 1 | 1 | -2 <i>J</i>  | 4 |
| 2 | 1 | 2 | 1 | 2 | -2 <i>J</i>  | 4 |
| 2 | 1 | 2 | 2 | 1 | -4 <i>J</i>  | 4 |
| 2 | 1 | 2 | 2 | 2 | -4 <i>J</i>  | 4 |
| 2 | 1 | 2 | 2 | 3 | -4 <i>J</i>  | 4 |
| 2 | 1 | 2 | 3 | 2 | -7 <i>J</i>  | 4 |
| 2 | 1 | 2 | 3 | 3 | -7 <i>J</i>  | 4 |
| 2 | 1 | 2 | 3 | 4 | -7 <i>J</i>  | 4 |
| 2 | 1 | 3 | 2 | 1 | - <i>J</i>   | 2 |
| 2 | 1 | 3 | 2 | 2 | - <i>J</i>   | 2 |
| 2 | 1 | 3 | 2 | 3 | - <i>J</i>   | 2 |
| 2 | 1 | 3 | 3 | 2 | -4 <i>J</i>  | 2 |
| 2 | 1 | 3 | 3 | 3 | -4 <i>J</i>  | 2 |
| 2 | 1 | 3 | 3 | 4 | -4 <i>J</i>  | 2 |
| 2 | 1 | 3 | 4 | 3 | -8 <i>J</i>  | 2 |
| 2 | 1 | 3 | 4 | 4 | -8 <i>J</i>  | 2 |
| 2 | 1 | 3 | 4 | 5 | -8 <i>J</i>  | 2 |

|   |   |   |   |   |       |   |
|---|---|---|---|---|-------|---|
| 2 | 2 | 0 | 1 | 1 | -7 J  | 2 |
| 2 | 2 | 0 | 1 | 2 | -7 J  | 2 |
| 2 | 2 | 0 | 1 | 3 | -7 J  | 2 |
| 2 | 2 | 1 | 0 | 2 | -5 J  | 6 |
| 2 | 2 | 1 | 1 | 1 | -6 J  | 6 |
| 2 | 2 | 1 | 1 | 2 | -6 J  | 6 |
| 2 | 2 | 1 | 1 | 3 | -6 J  | 6 |
| 2 | 2 | 1 | 2 | 0 | -8 J  | 6 |
| 2 | 2 | 1 | 2 | 1 | -8 J  | 6 |
| 2 | 2 | 1 | 2 | 2 | -8 J  | 6 |
| 2 | 2 | 1 | 2 | 3 | -8 J  | 6 |
| 2 | 2 | 1 | 2 | 4 | -8 J  | 6 |
| 2 | 2 | 2 | 1 | 1 | -4 J  | 4 |
| 2 | 2 | 2 | 1 | 2 | -4 J  | 4 |
| 2 | 2 | 2 | 1 | 3 | -4 J  | 4 |
| 2 | 2 | 2 | 2 | 0 | -6 J  | 4 |
| 2 | 2 | 2 | 2 | 1 | -6 J  | 4 |
| 2 | 2 | 2 | 2 | 2 | -6 J  | 4 |
| 2 | 2 | 2 | 2 | 3 | -6 J  | 4 |
| 2 | 2 | 2 | 2 | 4 | -6 J  | 4 |
| 2 | 2 | 2 | 3 | 1 | -9 J  | 4 |
| 2 | 2 | 2 | 3 | 2 | -9 J  | 4 |
| 2 | 2 | 2 | 3 | 3 | -9 J  | 4 |
| 2 | 2 | 2 | 3 | 4 | -9 J  | 4 |
| 2 | 2 | 2 | 3 | 5 | -9 J  | 4 |
| 2 | 2 | 3 | 2 | 0 | -3 J  | 2 |
| 2 | 2 | 3 | 2 | 1 | -3 J  | 2 |
| 2 | 2 | 3 | 2 | 2 | -3 J  | 2 |
| 2 | 2 | 3 | 2 | 3 | -3 J  | 2 |
| 2 | 2 | 3 | 2 | 4 | -3 J  | 2 |
| 2 | 2 | 3 | 3 | 1 | -6 J  | 2 |
| 2 | 2 | 3 | 3 | 2 | -6 J  | 2 |
| 2 | 2 | 3 | 3 | 3 | -6 J  | 2 |
| 2 | 2 | 3 | 3 | 4 | -6 J  | 2 |
| 2 | 2 | 3 | 3 | 5 | -6 J  | 2 |
| 2 | 2 | 3 | 4 | 2 | -10 J | 2 |
| 2 | 2 | 3 | 4 | 3 | -10 J | 2 |
| 2 | 2 | 3 | 4 | 4 | -10 J | 2 |
| 2 | 2 | 3 | 4 | 5 | -10 J | 2 |
| 2 | 2 | 3 | 4 | 6 | -10 J | 2 |
| 2 | 3 | 0 | 1 | 2 | -10 J | 2 |
| 2 | 3 | 0 | 1 | 3 | -10 J | 2 |
| 2 | 3 | 0 | 1 | 4 | -10 J | 2 |
| 2 | 3 | 1 | 0 | 3 | -8 J  | 6 |
| 2 | 3 | 1 | 1 | 2 | -9 J  | 6 |
| 2 | 3 | 1 | 1 | 3 | -9 J  | 6 |

|   |   |   |   |   |       |   |
|---|---|---|---|---|-------|---|
| 2 | 3 | 1 | 1 | 4 | -9 J  | 6 |
| 2 | 3 | 1 | 2 | 1 | -11 J | 6 |
| 2 | 3 | 1 | 2 | 2 | -11 J | 6 |
| 2 | 3 | 1 | 2 | 3 | -11 J | 6 |
| 2 | 3 | 1 | 2 | 4 | -11 J | 6 |
| 2 | 3 | 1 | 2 | 5 | -11 J | 6 |
| 2 | 3 | 2 | 1 | 2 | -7 J  | 4 |
| 2 | 3 | 2 | 1 | 3 | -7 J  | 4 |
| 2 | 3 | 2 | 1 | 4 | -7 J  | 4 |
| 2 | 3 | 2 | 2 | 1 | -9 J  | 4 |
| 2 | 3 | 2 | 2 | 2 | -9 J  | 4 |
| 2 | 3 | 2 | 2 | 3 | -9 J  | 4 |
| 2 | 3 | 2 | 2 | 4 | -9 J  | 4 |
| 2 | 3 | 2 | 2 | 5 | -9 J  | 4 |
| 2 | 3 | 2 | 3 | 0 | -12 J | 4 |
| 2 | 3 | 2 | 3 | 1 | -12 J | 4 |
| 2 | 3 | 2 | 3 | 2 | -12 J | 4 |
| 2 | 3 | 2 | 3 | 3 | -12 J | 4 |
| 2 | 3 | 2 | 3 | 4 | -12 J | 4 |
| 2 | 3 | 2 | 3 | 5 | -12 J | 4 |
| 2 | 3 | 2 | 3 | 6 | -12 J | 4 |
| 2 | 3 | 3 | 2 | 1 | -6 J  | 2 |
| 2 | 3 | 3 | 2 | 2 | -6 J  | 2 |
| 2 | 3 | 3 | 2 | 3 | -6 J  | 2 |
| 2 | 3 | 3 | 2 | 4 | -6 J  | 2 |
| 2 | 3 | 3 | 2 | 5 | -6 J  | 2 |
| 2 | 3 | 3 | 3 | 0 | -9 J  | 2 |
| 2 | 3 | 3 | 3 | 1 | -9 J  | 2 |
| 2 | 3 | 3 | 3 | 2 | -9 J  | 2 |
| 2 | 3 | 3 | 3 | 3 | -9 J  | 2 |
| 2 | 3 | 3 | 3 | 4 | -9 J  | 2 |
| 2 | 3 | 3 | 3 | 5 | -9 J  | 2 |
| 2 | 3 | 3 | 3 | 6 | -9 J  | 2 |
| 2 | 3 | 3 | 4 | 1 | -13 J | 2 |
| 2 | 3 | 3 | 4 | 2 | -13 J | 2 |
| 2 | 3 | 3 | 4 | 3 | -13 J | 2 |
| 2 | 3 | 3 | 4 | 4 | -13 J | 2 |
| 2 | 3 | 3 | 4 | 5 | -13 J | 2 |
| 2 | 3 | 3 | 4 | 6 | -13 J | 2 |
| 2 | 3 | 3 | 4 | 7 | -13 J | 2 |
| 3 | 2 | 0 | 1 | 1 | -4 J  | 1 |
| 3 | 2 | 0 | 1 | 2 | -4 J  | 1 |
| 3 | 2 | 0 | 1 | 3 | -4 J  | 1 |
| 3 | 2 | 1 | 0 | 2 | -2 J  | 3 |
| 3 | 2 | 1 | 1 | 1 | -3 J  | 3 |
| 3 | 2 | 1 | 1 | 2 | -3 J  | 3 |

|   |   |   |   |   |                           |   |
|---|---|---|---|---|---------------------------|---|
| 3 | 2 | 1 | 1 | 3 | -3 <i>J</i>               | 3 |
| 3 | 2 | 1 | 2 | 0 | -5 <i>J</i>               | 3 |
| 3 | 2 | 1 | 2 | 1 | -5 <i>J</i>               | 3 |
| 3 | 2 | 1 | 2 | 2 | -5 <i>J</i>               | 3 |
| 3 | 2 | 1 | 2 | 3 | -5 <i>J</i>               | 3 |
| 3 | 2 | 1 | 2 | 4 | -5 <i>J</i>               | 3 |
| 3 | 2 | 2 | 1 | 1 | - <i>J</i>                | 2 |
| 3 | 2 | 2 | 1 | 2 | - <i>J</i>                | 2 |
| 3 | 2 | 2 | 1 | 3 | - <i>J</i>                | 2 |
| 3 | 2 | 2 | 2 | 0 | -3 <i>J</i>               | 2 |
| 3 | 2 | 2 | 2 | 1 | -3 <i>J</i>               | 2 |
| 3 | 2 | 2 | 2 | 2 | -3 <i>J</i>               | 2 |
| 3 | 2 | 2 | 2 | 3 | -3 <i>J</i>               | 2 |
| 3 | 2 | 2 | 2 | 4 | -3 <i>J</i>               | 2 |
| 3 | 2 | 2 | 3 | 1 | -6 <i>J</i>               | 2 |
| 3 | 2 | 2 | 3 | 2 | -6 <i>J</i>               | 2 |
| 3 | 2 | 2 | 3 | 3 | -6 <i>J</i>               | 2 |
| 3 | 2 | 2 | 3 | 4 | -6 <i>J</i>               | 2 |
| 3 | 2 | 2 | 3 | 5 | -6 <i>J</i>               | 2 |
| 3 | 2 | 3 | 2 | 0 | 6 <i>j<sub>eff</sub></i>  | 1 |
| 3 | 2 | 3 | 2 | 1 | 5 <i>j<sub>eff</sub></i>  | 1 |
| 3 | 2 | 3 | 2 | 2 | 3 <i>j<sub>eff</sub></i>  | 1 |
| 3 | 2 | 3 | 2 | 3 | 0                         | 1 |
| 3 | 2 | 3 | 2 | 4 | -4 <i>j<sub>eff</sub></i> | 1 |
| 3 | 2 | 3 | 3 | 1 | -3 <i>J</i>               | 1 |
| 3 | 2 | 3 | 3 | 2 | -3 <i>J</i>               | 1 |
| 3 | 2 | 3 | 3 | 3 | -3 <i>J</i>               | 1 |
| 3 | 2 | 3 | 3 | 4 | -3 <i>J</i>               | 1 |
| 3 | 2 | 3 | 3 | 5 | -3 <i>J</i>               | 1 |
| 3 | 2 | 3 | 4 | 2 | -7 <i>J</i>               | 1 |
| 3 | 2 | 3 | 4 | 3 | -7 <i>J</i>               | 1 |
| 3 | 2 | 3 | 4 | 4 | -7 <i>J</i>               | 1 |
| 3 | 2 | 3 | 4 | 5 | -7 <i>J</i>               | 1 |
| 3 | 2 | 3 | 4 | 6 | -7 <i>J</i>               | 1 |
| 3 | 3 | 0 | 1 | 2 | -7 <i>J</i>               | 1 |
| 3 | 3 | 0 | 1 | 3 | -7 <i>J</i>               | 1 |
| 3 | 3 | 0 | 1 | 4 | -7 <i>J</i>               | 1 |
| 3 | 3 | 1 | 0 | 3 | -5 <i>J</i>               | 3 |
| 3 | 3 | 1 | 1 | 2 | -6 <i>J</i>               | 3 |
| 3 | 3 | 1 | 1 | 3 | -6 <i>J</i>               | 3 |
| 3 | 3 | 1 | 1 | 4 | -6 <i>J</i>               | 3 |
| 3 | 3 | 1 | 2 | 1 | -8 <i>J</i>               | 3 |
| 3 | 3 | 1 | 2 | 2 | -8 <i>J</i>               | 3 |
| 3 | 3 | 1 | 2 | 3 | -8 <i>J</i>               | 3 |
| 3 | 3 | 1 | 2 | 4 | -8 <i>J</i>               | 3 |
| 3 | 3 | 1 | 2 | 5 | -8 <i>J</i>               | 3 |

|   |   |   |   |   |       |   |
|---|---|---|---|---|-------|---|
| 3 | 3 | 2 | 1 | 2 | -4 J  | 2 |
| 3 | 3 | 2 | 1 | 3 | -4 J  | 2 |
| 3 | 3 | 2 | 1 | 4 | -4 J  | 2 |
| 3 | 3 | 2 | 2 | 1 | -6 J  | 2 |
| 3 | 3 | 2 | 2 | 2 | -6 J  | 2 |
| 3 | 3 | 2 | 2 | 3 | -6 J  | 2 |
| 3 | 3 | 2 | 2 | 4 | -6 J  | 2 |
| 3 | 3 | 2 | 2 | 5 | -6 J  | 2 |
| 3 | 3 | 2 | 3 | 0 | -9 J  | 2 |
| 3 | 3 | 2 | 3 | 1 | -9 J  | 2 |
| 3 | 3 | 2 | 3 | 2 | -9 J  | 2 |
| 3 | 3 | 2 | 3 | 3 | -9 J  | 2 |
| 3 | 3 | 2 | 3 | 4 | -9 J  | 2 |
| 3 | 3 | 2 | 3 | 5 | -9 J  | 2 |
| 3 | 3 | 2 | 3 | 6 | -9 J  | 2 |
| 3 | 3 | 3 | 2 | 1 | -3 J  | 1 |
| 3 | 3 | 3 | 2 | 2 | -3 J  | 1 |
| 3 | 3 | 3 | 2 | 3 | -3 J  | 1 |
| 3 | 3 | 3 | 2 | 4 | -3 J  | 1 |
| 3 | 3 | 3 | 2 | 5 | -3 J  | 1 |
| 3 | 3 | 3 | 3 | 0 | -6 J  | 1 |
| 3 | 3 | 3 | 3 | 1 | -6 J  | 1 |
| 3 | 3 | 3 | 3 | 2 | -6 J  | 1 |
| 3 | 3 | 3 | 3 | 3 | -6 J  | 1 |
| 3 | 3 | 3 | 3 | 4 | -6 J  | 1 |
| 3 | 3 | 3 | 3 | 5 | -6 J  | 1 |
| 3 | 3 | 3 | 3 | 6 | -6 J  | 1 |
| 3 | 3 | 3 | 4 | 1 | -10 J | 1 |
| 3 | 3 | 3 | 4 | 2 | -10 J | 1 |
| 3 | 3 | 3 | 4 | 3 | -10 J | 1 |
| 3 | 3 | 3 | 4 | 4 | -10 J | 1 |
| 3 | 3 | 3 | 4 | 5 | -10 J | 1 |
| 3 | 3 | 3 | 4 | 6 | -10 J | 1 |
| 3 | 3 | 3 | 4 | 7 | -10 J | 1 |
| 3 | 4 | 0 | 1 | 3 | -11 J | 1 |
| 3 | 4 | 0 | 1 | 4 | -11 J | 1 |
| 3 | 4 | 0 | 1 | 5 | -11 J | 1 |
| 3 | 4 | 1 | 0 | 4 | -9 J  | 3 |
| 3 | 4 | 1 | 1 | 3 | -10 J | 3 |
| 3 | 4 | 1 | 1 | 4 | -10 J | 3 |
| 3 | 4 | 1 | 1 | 5 | -10 J | 3 |
| 3 | 4 | 1 | 2 | 2 | -12 J | 3 |
| 3 | 4 | 1 | 2 | 3 | -12 J | 3 |
| 3 | 4 | 1 | 2 | 4 | -12 J | 3 |
| 3 | 4 | 1 | 2 | 5 | -12 J | 3 |
| 3 | 4 | 1 | 2 | 6 | -12 J | 3 |

|   |   |   |   |   |              |   |
|---|---|---|---|---|--------------|---|
| 3 | 4 | 2 | 1 | 3 | -8 <i>J</i>  | 2 |
| 3 | 4 | 2 | 1 | 4 | -8 <i>J</i>  | 2 |
| 3 | 4 | 2 | 1 | 5 | -8 <i>J</i>  | 2 |
| 3 | 4 | 2 | 2 | 2 | -10 <i>J</i> | 2 |
| 3 | 4 | 2 | 2 | 3 | -10 <i>J</i> | 2 |
| 3 | 4 | 2 | 2 | 4 | -10 <i>J</i> | 2 |
| 3 | 4 | 2 | 2 | 5 | -10 <i>J</i> | 2 |
| 3 | 4 | 2 | 2 | 6 | -10 <i>J</i> | 2 |
| 3 | 4 | 2 | 3 | 1 | -13 <i>J</i> | 2 |
| 3 | 4 | 2 | 3 | 2 | -13 <i>J</i> | 2 |
| 3 | 4 | 2 | 3 | 3 | -13 <i>J</i> | 2 |
| 3 | 4 | 2 | 3 | 4 | -13 <i>J</i> | 2 |
| 3 | 4 | 2 | 3 | 5 | -13 <i>J</i> | 2 |
| 3 | 4 | 2 | 3 | 6 | -13 <i>J</i> | 2 |
| 3 | 4 | 2 | 3 | 7 | -13 <i>J</i> | 2 |
| 3 | 4 | 3 | 2 | 2 | -7 <i>J</i>  | 1 |
| 3 | 4 | 3 | 2 | 3 | -7 <i>J</i>  | 1 |
| 3 | 4 | 3 | 2 | 4 | -7 <i>J</i>  | 1 |
| 3 | 4 | 3 | 2 | 5 | -7 <i>J</i>  | 1 |
| 3 | 4 | 3 | 2 | 6 | -7 <i>J</i>  | 1 |
| 3 | 4 | 3 | 3 | 1 | -10 <i>J</i> | 1 |
| 3 | 4 | 3 | 3 | 2 | -10 <i>J</i> | 1 |
| 3 | 4 | 3 | 3 | 3 | -10 <i>J</i> | 1 |
| 3 | 4 | 3 | 3 | 4 | -10 <i>J</i> | 1 |
| 3 | 4 | 3 | 3 | 5 | -10 <i>J</i> | 1 |
| 3 | 4 | 3 | 3 | 6 | -10 <i>J</i> | 1 |
| 3 | 4 | 3 | 3 | 7 | -10 <i>J</i> | 1 |
| 3 | 4 | 3 | 4 | 0 | -14 <i>J</i> | 1 |
| 3 | 4 | 3 | 4 | 1 | -14 <i>J</i> | 1 |
| 3 | 4 | 3 | 4 | 2 | -14 <i>J</i> | 1 |
| 3 | 4 | 3 | 4 | 3 | -14 <i>J</i> | 1 |
| 3 | 4 | 3 | 4 | 4 | -14 <i>J</i> | 1 |
| 3 | 4 | 3 | 4 | 5 | -14 <i>J</i> | 1 |
| 3 | 4 | 3 | 4 | 6 | -14 <i>J</i> | 1 |
| 3 | 4 | 3 | 4 | 7 | -14 <i>J</i> | 1 |
| 3 | 4 | 3 | 4 | 8 | -14 <i>J</i> | 1 |

<sup>a</sup>  $S$  are the spin values of the  $\text{Ni}^{\text{II}}_8$  entity,  $S_A$  and  $S_B$  are the spin values of each  $\text{Ni}^{\text{II}}_4$  star unit, and  $S^*_A$  and  $S^*_B$  are the intermediate spin values corresponding to the coupling of the three peripheral high-spin  $\text{Ni}^{\text{II}}$  ions of each  $\text{Ni}^{\text{II}}_4$  star unit. <sup>b</sup>  $E$  and  $n$  are the spin state energy and the number of degenerated spin states. <sup>c</sup>  $J$  and  $j_{\text{eff}}$  are the intratetramer and effective intertetramer coupling parameters as defined in eq S1 [with  $S_{1A} = S_{3A} = S_{4A} = S_{5A} = S_{2B} = S_{6B} = S_{7B} = S_{8B} = S_{\text{Ni}} = 1$ , and  $S_A = S_B = 2$ ].
